# Supplementary material for: Solution-mediated nanometric growth of α-Fe2O3 with electrocatalytic activity for water oxidation
Source: Nanoscale Adv. 2020 Jul 20;2(9):3933–41. doi: 10.1039/d0na00345j (PMC9417511; doi:10.1039/d0na00345j)
Supplement: NA-002-D0NA00345J-s001 [file NA-002-D0NA00345J-s001.pdf]

## Supporting Information

### **Solution-mediated Nanometric Growth of $\alpha$ -Fe<sub>2</sub>O<sub>3</sub> with Electrocatalytic Activity for Water Oxidation**

Asako Taniguchi<sup>a,b\*</sup>, Yuta Kubota<sup>c</sup>, Nobuhiro Matsushita<sup>c</sup>, Kento Ishii<sup>b</sup>, Tetsuo Uchikoshi<sup>b</sup>

<sup>a</sup>Graduate School of Pure and Applied Sciences, University of Tsukuba, 1-1-1 Tennodai, Tsukuba, Ibaraki 305-8573, Japan

<sup>b</sup>Research Center for Functional Materials, National Institute for Materials Science (NIMS), 1-2-1 Sengen, Tsukuba, Ibaraki 305-0047, Japan

<sup>c</sup>Department of Materials Science and Engineering, School of Materials and Chemical Technology, Tokyo Institute of Technology, 2-12-1 Ookayama, Meguro-ku, Tokyo 152-8550, Japan

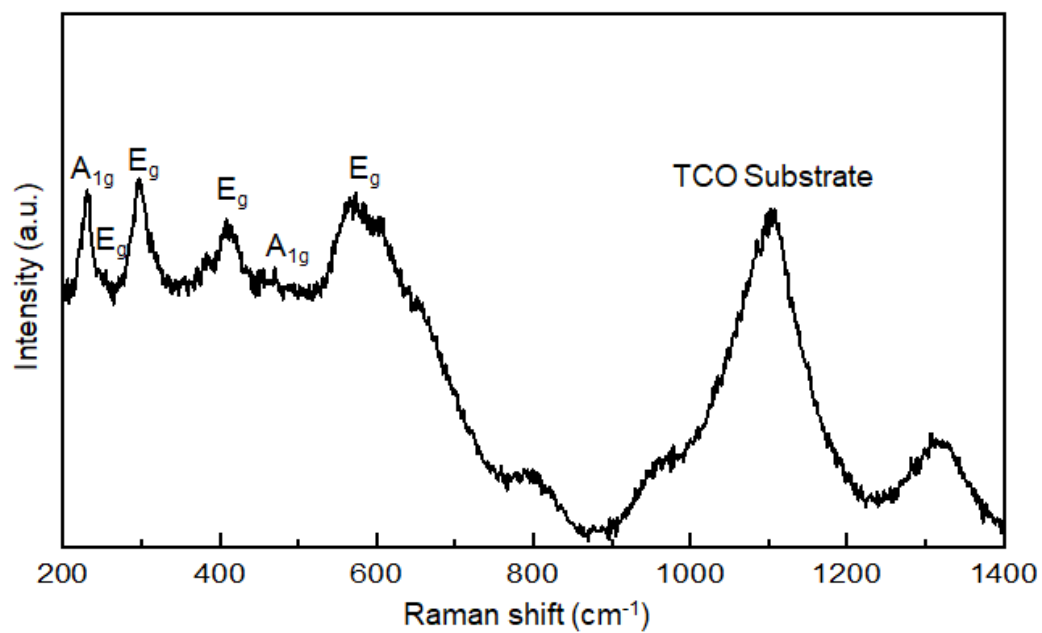

**Figure S1.** Wide-range Raman spectrum of SMART-derived  $\alpha$ -Fe<sub>2</sub>O<sub>3</sub> on a glass substrate deposited after 90 cycles.

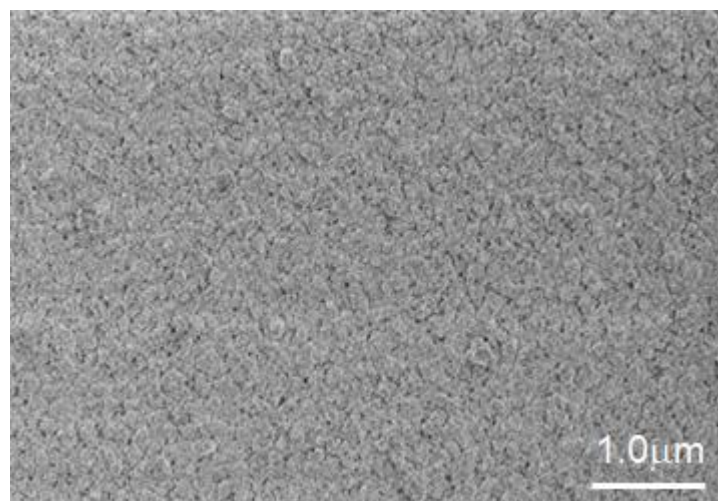

**Figure S2.** Low magnification SEM image of SMART-derived  $\alpha$ -Fe<sub>2</sub>O<sub>3</sub> layer on a glass substrate after 90 deposition cycles.

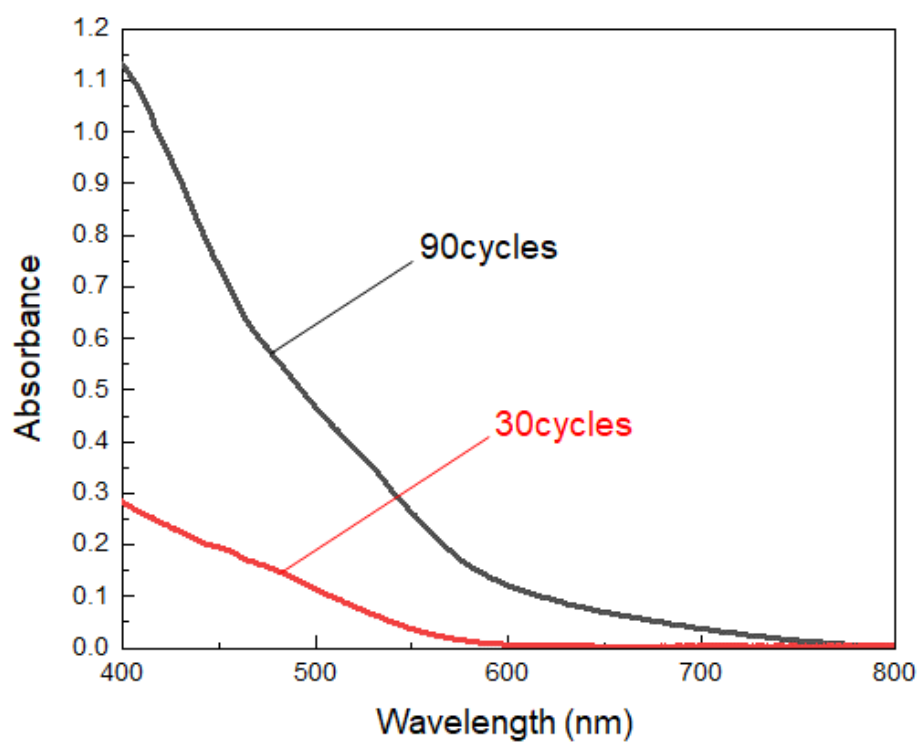

**Figure S3.** UV-vis spectra of SMART-derived  $\alpha$ -Fe<sub>2</sub>O<sub>3</sub> layer on a glass substrate after 30 and 90 deposition cycles.

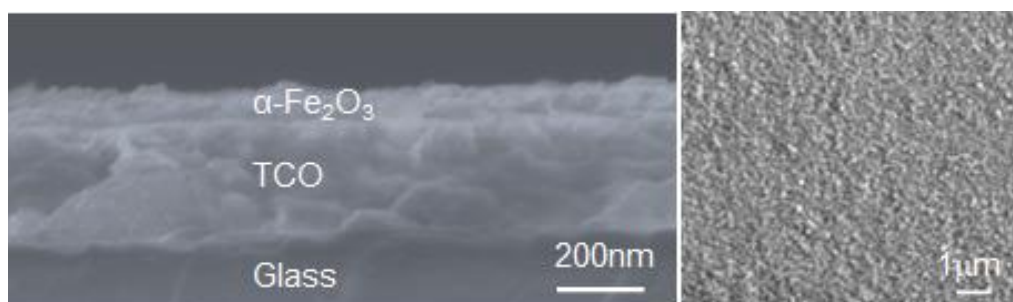

**Figure S4.** SEM images of SMART-derived  $\alpha$ -Fe<sub>2</sub>O<sub>3</sub> on an TCO substrate deposited after 30 cycles.

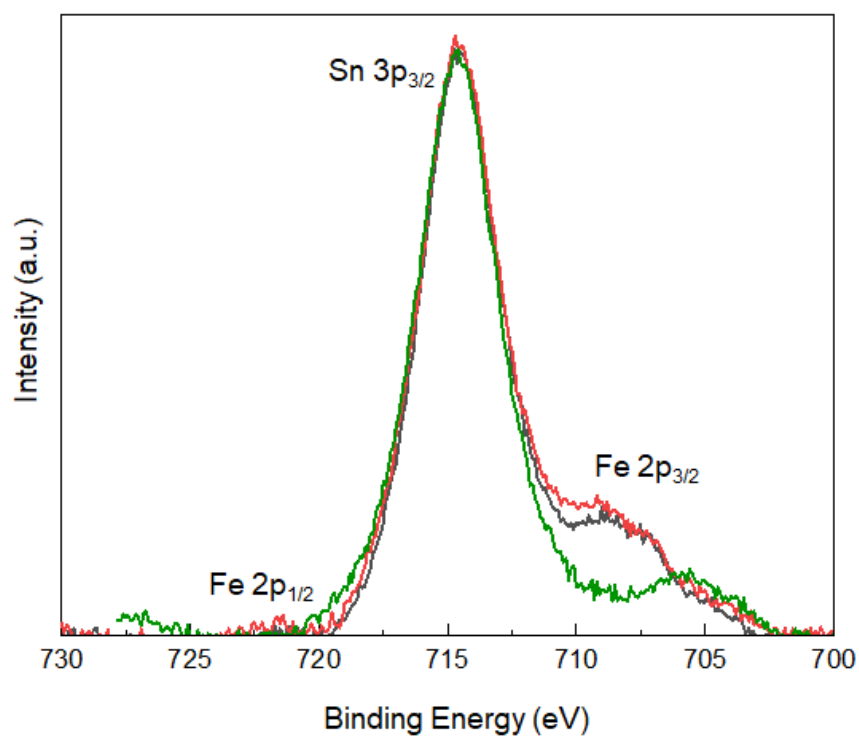

**Figure S5.** As-measured Fe 2p XPS spectra after the first step (black) and second step (red) in the first deposition cycle, and Sn 3p spectra of a bare TCO substrate (green).

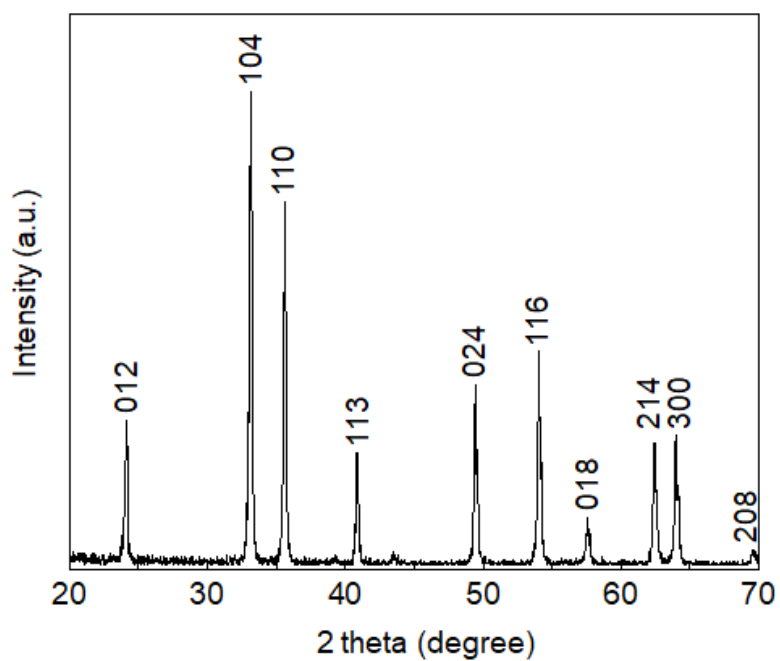

**Figure S6.** XRD pattern of reference  $\alpha$ -Fe<sub>2</sub>O<sub>3</sub> powder.

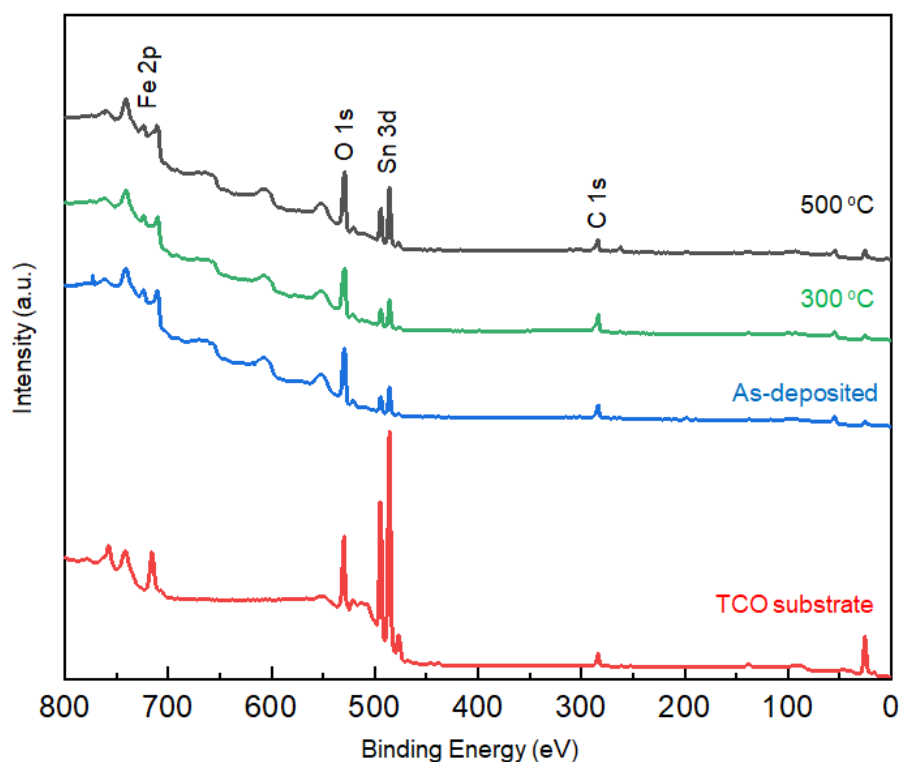

**Figure S7.** Wide-scan XPS spectrum of the SMART-derived  $\alpha$ -Fe<sub>2</sub>O<sub>3</sub> deposited on an TCO substrate, as-deposited, and subsequently annealed at 300 °C and 500 °C. Wide-scan XPS spectrum of TCO substrate is shown as a reference.

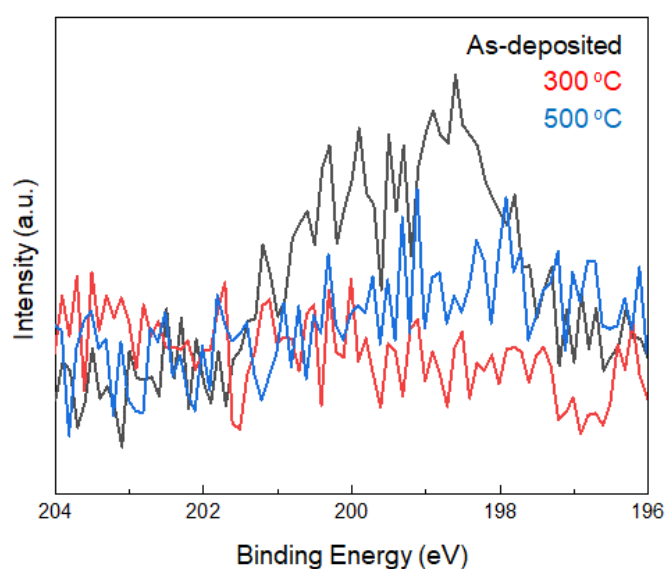

**Figure S8.** Cl 2p spectra of the SMART-derived  $\alpha$ -Fe<sub>2</sub>O<sub>3</sub> deposited on an TCO substrate, as-deposited, and after annealing at 300 °C and 500 °C.

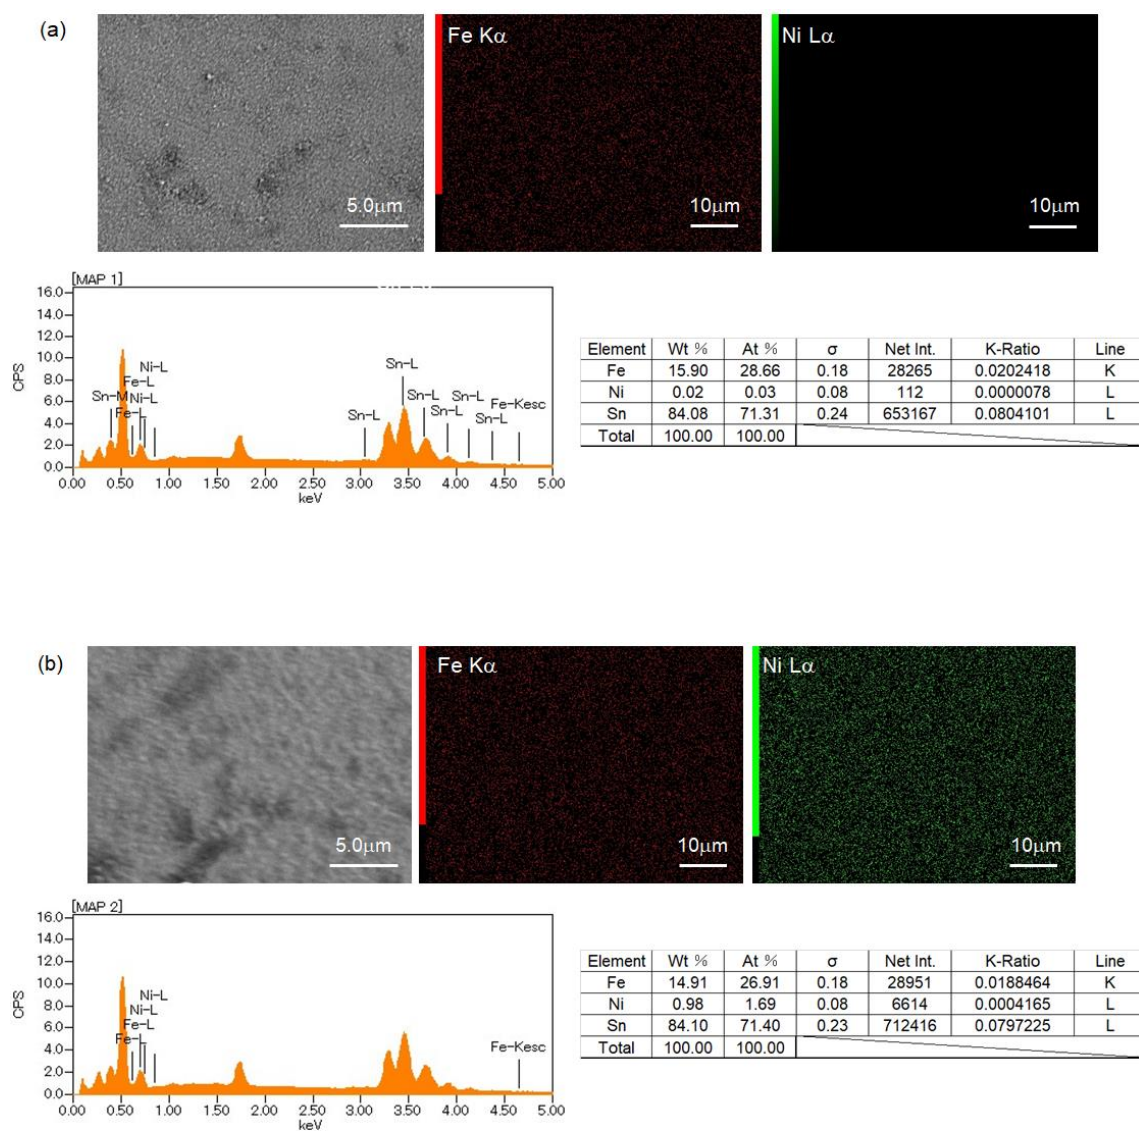

**Figure S9.** SEM images and Fe/Ni distributions obtained by EDS elemental mapping of SMART-derived  $\alpha$ -Fe<sub>2</sub>O<sub>3</sub> (a) before and (b) after Ni(OH)<sub>2</sub> surface-modification.

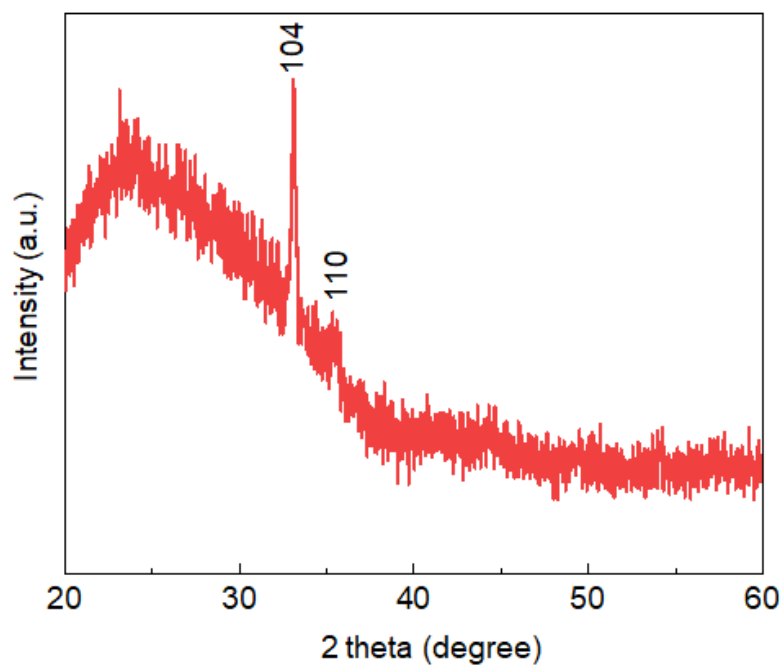

**Figure S10.** XRD pattern of the SMART-derived  $\alpha$ -Fe<sub>2</sub>O<sub>3</sub> (annealed at 500 °C) after Ni(OH)<sub>2</sub> surface-modification. Note that  $\alpha$ -Fe<sub>2</sub>O<sub>3</sub> layer was deposited after 90 cycles.

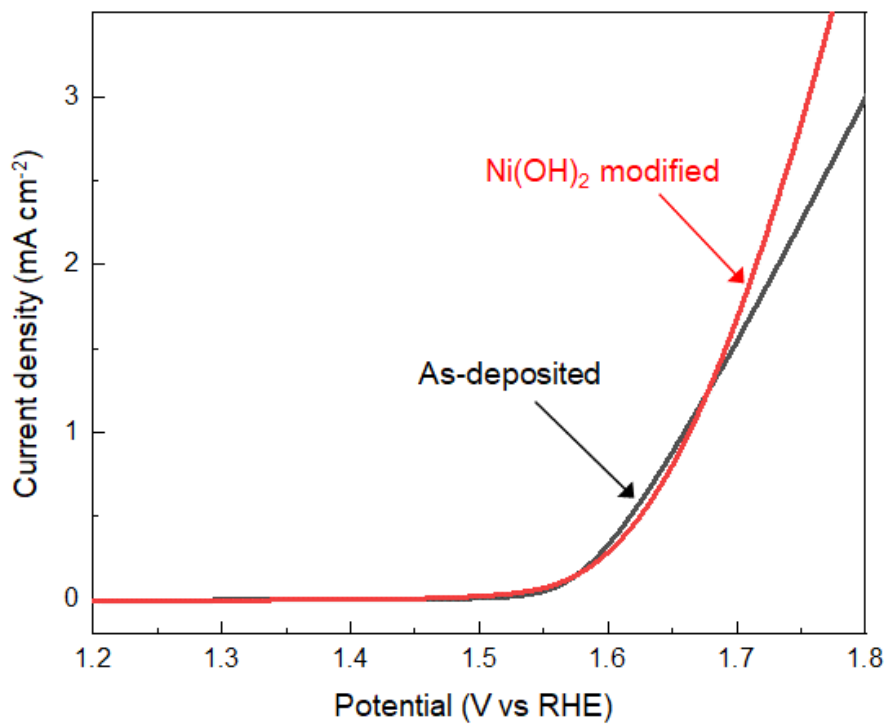

**Figure S11.** LSV-curves of the SMART-derived  $\alpha$ -Fe<sub>2</sub>O<sub>3</sub> before/after Ni(OH)<sub>2</sub> surface-modification.
